# Supplementary material
Source: PubMed Central journal article supplement (PMC3120087)
Supplement: Supp_Fig.pdf [file Supp_Fig.pdf]

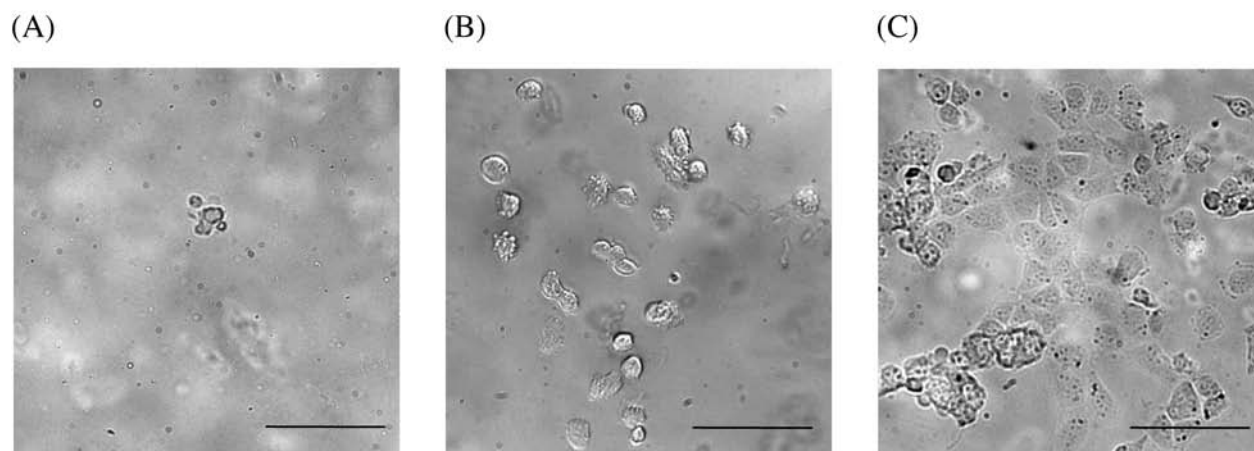

**SUPPLEMENTAL FIG. 1.** SSC colony formation on 2D surfaces was enhanced with increasing  $N_{\text{RGD}}$ . (A), (B), and (C) represent C18-4 cells attached to gels presenting  $N_{\text{RGD}}$  of  $6.2$ ,  $31$ , and  $56 \times 10^7$  RGD/ $\text{mm}^2$ , respectively. Scale bars represent  $50 \mu\text{m}$ .

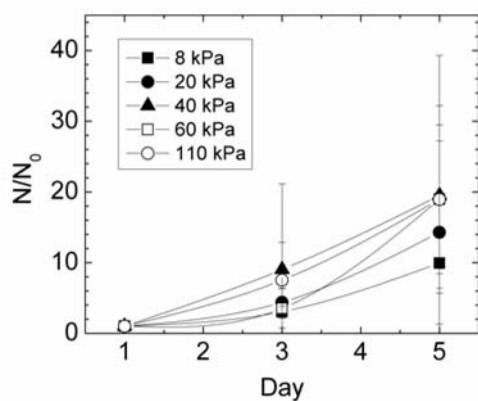

**SUPPLEMENTAL FIG. 2.** Cell proliferation on 2D hydrogel surfaces was roughly independent of the elastic modulus of the hydrogel.  $N_{\text{RGD}}$  was kept constant at  $6.2 \times 10^8$  RGD/ $\text{mm}^2$  while the elastic modulus was varied from 8 to 110 kPa.  $N$  and  $N_0$  represent the cell number and the cell number measured at day 1, respectively. ■, ●, ▲, □, and ○ represent gels with elastic moduli of 8, 20, 40, 60, and 110 kPa, respectively.

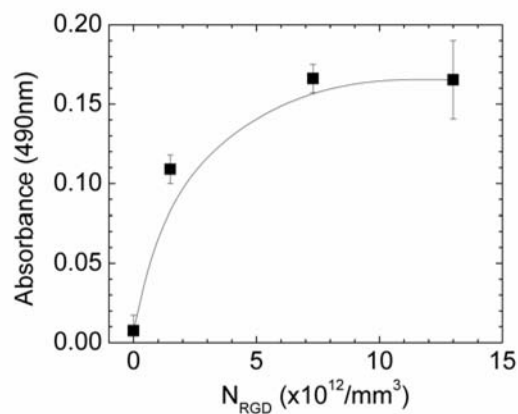

**SUPPLEMENTAL FIG. 3.** Cell viability in 3D hydrogel cultures on day 5 increased with increasing  $N_{\text{RGD}}$  density. The absorbance measured at 490 nm, in accordance with an MTS-based proliferation assay, is proportional to the number of viable cells.  $N_{\text{RGD}}$  was varied from 0 to  $1.3 \times 10^{13}$  RGD/ $\text{mm}^3$ .
